# Supplementary material for: Highly efficient SO2capture by phenyl-containing azole-based ionic liquids through multiple-site interactions
Source: Royal Society of Chemistry journal article supplement (doi:10.1039/c3gc41458b), 2013-10-16
Supplement: c3gc41458b.pdf [file c3gc41458b.pdf]

## Electronic Supplementary Information

### **Highly efficient SO<sub>2</sub> capture by phenyl-containing azole-based ionic liquids through multiple-site interactions**

Guokai Cui,<sup>a,b</sup> Wenjun Lin,<sup>a</sup> Fang Ding,<sup>a</sup> Xiaoyan Luo,<sup>a</sup> Xi He,<sup>a</sup> Haoran Li<sup>a,c</sup> and Congmin Wang<sup>a,\*</sup>

<sup>a</sup> Department of Chemistry, ZJU-NHU United R&D Center, Zhejiang University, Hangzhou 310027, China

<sup>b</sup> School of Chemistry and Chemical Engineering, Key Laboratory of Green Chemical Media and Reactions, Ministry of Education, Henan Normal University, Xinxiang, 453007, China.

<sup>c</sup> State Key Laboratory of Chemical Engineering, Department of Chemical and Biological Engineering, Zhejiang University, Hangzhou 310027, China

Email: [chewcm@zju.edu.cn](mailto:chewcm@zju.edu.cn)

## Experimental Section

### *Synthesis of [BzMim][Tf<sub>2</sub>N].*

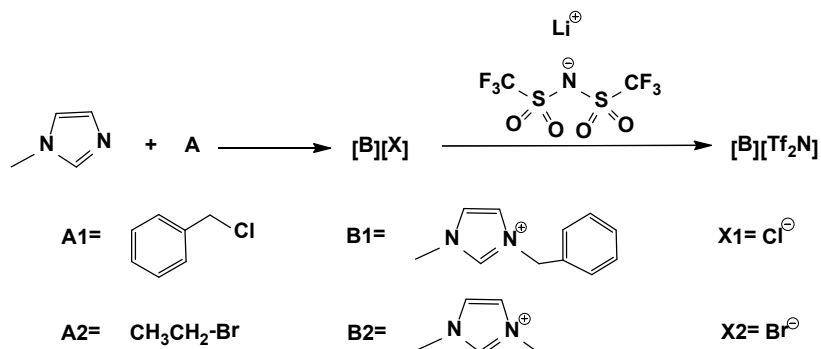

Figure A1. Synthetic route of [BzMim][Tf<sub>2</sub>N] and [EMim].

[BzMim][Tf<sub>2</sub>N] was synthesized according to Figure A1. In a 250 ml three-necked flask, 1-methylimidazole (16.42 g, 0.2 mol) was slowly added dropwise to benzyl chloride (25.32 g, 0.2 mol) at room temperature with vigorous stirring, and the reaction mixture became cloudy and viscous. A clear yellow gel formed after the addition was completed. Then 50 ml deionized water was added to dissolve. LiTf<sub>2</sub>N (57.42 g, 0.2 mol) predissolved in 50 ml deionized water was slowly added dropwise to this aqueous solution with stirring for 2 h at room temperature. After the mixture had stood, the top phase was decanted, and the lower phase was separated, which was dissolved in 50 ml CH<sub>2</sub>Cl<sub>2</sub> and washed with deionized water until no Cl<sup>-</sup> could be detected. The product was concentrated under reduced pressure at 60 °C to remove CH<sub>2</sub>Cl<sub>2</sub> and dried under high vacuum at 90 °C for 24 h to give [BzMim][Tf<sub>2</sub>N] (42.76 g, 47.16 %) as a colorless liquid. The sample was kept in glass vial, closed with screw cap to ensure a secure seal and prevent humidity.

### *Synthesis of [EMim][Br].*

[EMim][Br] was prepared by the same procedure reported by the literature.<sup>1</sup> 1-Methylimidazole (16.42 g, 0.20 mol) and bromoethane (26.15 g, 0.24 mol) were used, and [EMim][Br] (36.3 g, 95 %) as a white solid was obtained after the reaction. The sample was kept in glass vial, closed with screw cap to ensure a secure seal and prevent humidity.

### Synthesis of [EMim][Tf<sub>2</sub>N].

[EMim][Tf<sub>2</sub>N] was synthesized from [EMim][Br] and LiTf<sub>2</sub>N by the same procedure used as for [Bzmim][Tf<sub>2</sub>N]. [EMim][Br] (38.21 g, 0.2 mol) was dissolved by 50 ml deionized. LiTf<sub>2</sub>N (57.42 g, 0.2 mol) predissolved in 50 ml deionized water was slowly added dropwise to this aqueous solution with stirring for 2 h at 70 °C. After the mixture had standed, the top phase was decanted, and the lower phase was separated, which was dissolved in 50 ml CH<sub>2</sub>Cl<sub>2</sub> and washed with deionized water until no Br<sup>-</sup> could be detected. The product was concentrated under reduced pressure at 60 °C to remove CH<sub>2</sub>Cl<sub>2</sub> and dried under high vacuum at 90 °C for 24 h to give [EMim][Tf<sub>2</sub>N] (55.18 g, 72.3%) as a colorless liquid. The sample was kept in glass vial, closed with screw cap to ensure a secure seal and prevent humidity.

The structures of these ILs were confirmed by NMR and IR spectroscopy; no impurities were found by NMR. The water content of these ILs was determined with a Karl Fisher titration (Mettler Toledo DL32, Switzerland) and found to be less than 0.1 wt%. The residual bromide content of these ILs was determined by a semi-quantitative Nessler cylinder method, which showed that bromide content was lower than 0.15 wt%.

### NMR and IR data of ILs

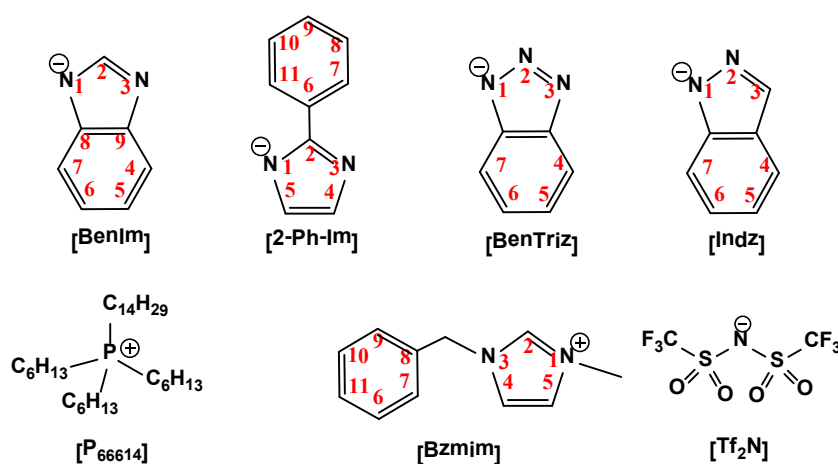

Figure A2. Numbering scheme for positions in the typical ILs.

[P<sub>66614</sub>][BenIm]: <sup>1</sup>H NMR (DMSO-d<sub>6</sub>): 0.87 (m, 12H, CH<sub>3</sub>), 1.20-1.50 (m, 48H, CH<sub>2</sub>),

2.12 (m, 8H, PCH<sub>2</sub>), 6.70 (m, 2H, C5 and C6), 7.31 (m, 2H, C4 and C7), 7.63 (s, 1H, C2) ppm; <sup>13</sup>C NMR (d6-DMSO): 14.2, 14.3, 17.6, 18.1, 21.0, 22.3, 22.6, 28.6, 29.1, 29.2, 29.5, 30.1, 30.2, 30.4, 30.5, 30.9, 31.8, 116.1 (C4 and C7), 116.4 (C5 and C6), 146.7 (C8 and C9), 152.5 (C2) ppm; IR: 3058, 3037, 2955, 2925, 2855, 1594, 1579, 1465, 1416, 1378, 1362, 1303, 1266, 1218, 1175, 1135, 1107, 1000, 914, 882, 771, 739, 720, 695, 683, 673, 660, 645 cm<sup>-1</sup>. MS: 483.7 for [P<sub>66614</sub>], 116.9 for [BenIm].

**After the absorption of SO<sub>2</sub>:** <sup>1</sup>H NMR (DMSO-d6): 0.85 (m, 12H, CH<sub>3</sub>), 1.20-1.50 (m, 48H, CH<sub>2</sub>), 2.18 (m, 8H, PCH<sub>2</sub>), 7.21 (m, 2H, C5 and C6), 7.63 (m, 2H, C4 and C7), 8.36 (s, 1H, C2) ppm; <sup>13</sup>C NMR (d6-DMSO): 14.3, 14.4, 18.0, 18.4, 21.2, 22.4, 22.7, 28.8, 29.3, 29.6, 30.3, 30.4, 30.2, 30.5, 30.7, 31.0, 31.9, 115.7 (C4 and C7), 122.7 (C5 and C6), 137.6 (C8 and C9), 142.1 (C2) ppm; IR: 2956, 2927, 2856, 1619, 1455, 1412, 1379, 1324, 1269, 1192, 1143, 1040, 1006, 947, 870, 775, 749, 720, 695, 684, 667, 657, 643 cm<sup>-1</sup>.

**[P<sub>66614</sub>][2-Ph-Im]:** <sup>1</sup>H NMR (DMSO-d6): 0.87 (m, 12H, CH<sub>3</sub>), 1.20-1.50 (m, 48H, CH<sub>2</sub>), 2.12 (m, 8H, PCH<sub>2</sub>), 6.74 (s, 2H, C4 and C5), 6.91 (t, 1H, C9), 7.14 (t, 1H, C8 and C10), 7.92 ppm (d, 1H, C7 and C11); <sup>13</sup>C NMR (d6-DMSO): 14.2, 14.3, 17.6, 18.1, 21.0, 22.3, 22.6, 28.6, 29.1, 29.2, 29.5, 30.1, 30.2, 30.3, 30.5, 30.9, 31.8, 123.4 (C6), 124.2 (C4 and C5), 127.6 (C8 and C10), 127.7 (C7 and C11), 139.6 (C9), 152.6 (C2) ppm; IR: 2955, 2925, 2855, 1737, 1663, 1638, 1599, 1577, 1504, 1486, 1457, 1401, 1378, 1269, 1215, 1163, 1132, 1103, 1066, 1054, 1027, 996, 929, 912, 861, 808, 772, 720, 698, 687, 674, 666, 657, 641 cm<sup>-1</sup>.

**After the absorption of SO<sub>2</sub>:** <sup>1</sup>H NMR (DMSO-d6): 0.85 (m, 12H, CH<sub>3</sub>), 1.20-1.60 (m, 48H, CH<sub>2</sub>), 2.19 (m, 8H, PCH<sub>2</sub>), 7.50-7.80 (m, 5H, C4,C5, C8~10), 8.03 ppm (d, 1H, C7 and C11); <sup>13</sup>C NMR (d6-DMSO): 14.3, 14.4, 17.9, 18.3, 21.1, 22.3, 22.6, 28.7, 29.2, 29.5, 29.6, 30.2, 30.3, 30.5, 30.6, 30.9, 31.8, 121.7 (C4 and C5), 125.8 (C6), 126.6 (C8 and C10), 129.8 (C7 and C11), 131.3 (C9), 144.6 (C2) ppm; IR: 2956, 2927, 2856, 1752, 1664, 1630, 1600, 1574, 1519, 1496, 1467, 1427, 1379, 1325, 1143, 1106, 1073, 1041, 1006, 951, 904, 811, 779, 755, 707, 690, 677, 667, 659, 637 cm<sup>-1</sup>.

**[P<sub>66614</sub>][BenTriz]:** <sup>1</sup>H NMR (d6-DMSO): 0.89 (m, 12H, CH<sub>3</sub>), 1.20-1.40 (m, 48H, CH<sub>2</sub>), 2.12 (m, 8H, PCH<sub>2</sub>), 6.83 (m, 2H, C5 and C6), 7.58 (m, 2H, C4 and C7) ppm; <sup>13</sup>C NMR (d6-DMSO): 14.1, 14.2, 17.7, 18.1, 21.0, 22.2, 22.5, 28.6, 29.2, 29.4, 29.5, 30.1, 30.2, 30.4, 30.5, 30.8, 31.8, 116.0, 118.9, 145.9 ppm; IR: 2955, 2925, 2855, 1465, 1408,

1381, 1302, 1275, 1215, 1172, 1140, 1121, 1057, 1001, 924, 810, 775, 742, 718, 693, 681, 668, 659, 651, 641  $\text{cm}^{-1}$ . MS: 483.7 for [ $\text{P}_{66614}$ ], 117.8 for [BenTriz].

**After the absorption of  $\text{SO}_2$ :**  $^1\text{H}$  NMR (d6-DMSO): 0.85 (m, 12H,  $\text{CH}_3$ ), 1.20-1.50 (m, 48H,  $\text{CH}_2$ ), 2.23 (m, 8H,  $\text{PCH}_2$ ), 7.39 (m, 2H, C5 and C6), 7.95 (m, 2H, C4 and C7) ppm;  $^{13}\text{C}$  NMR (d6-DMSO): 14.3, 14.4, 18.0, 18.4, 21.2, 21.3, 22.4, 22.7, 28.8, 29.4, 29.6, 29.7, 30.3, 30.4, 30.6, 30.7, 31.0, 31.9, 115.5, 125.4, 139.4 ppm; IR: 2956, 2928, 2856, 2361, 2342, 1460, 1413, 1378, 1326, 1262, 1209, 1192, 1144, 1045, 1008, 985, 943, 902, 828, 809, 798, 778, 749, 721, 693, 680, 670, 660, 651, 637  $\text{cm}^{-1}$ .

**[ $\text{P}_{66614}$ ][Indz]:**  $^1\text{H}$  NMR (d6-DMSO): 0.85 (m, 12H,  $\text{CH}_3$ ), 1.20-1.40 (m, 48H,  $\text{CH}_2$ ), 2.10 (m, 8H,  $\text{PCH}_2$ ), 6.73 (t, 1H, C5), 6.91 (t, 1H, C6), 7.48 (d, 1H, C7), 7.54 (d, 1H, C4), 7.89 (s, 1H, C3) ppm;  $^{13}\text{C}$  NMR (d6-DMSO): 14.3, 14.4, 17.7, 18.0, 21.0, 21.1, 22.4, 22.6, 28.6, 29.2, 29.2, 29.5, 29.6, 30.2, 30.3, 30.4, 30.5, 30.9, 31.8, 113.9, 116.8, 119.4, 121.2, 124.0, 130.9, 147.2 ppm; IR: 2954, 2924, 2854, 1669, 1465, 1377, 1357, 1277, 1211, 1161, 1110, 1054, 995, 939, 809, 782, 756, 731, 692, 680, 668, 658, 650, 641  $\text{cm}^{-1}$ . MS: 483.7 for [ $\text{P}_{66614}$ ], 112.9 for [Indz].

**After the absorption of  $\text{SO}_2$ :**  $^1\text{H}$  NMR (d6-DMSO): 0.87 (m, 12H,  $\text{CH}_3$ ), 1.20-1.40 (m, 48H,  $\text{CH}_2$ ), 2.20 (m, 8H,  $\text{PCH}_2$ ), 7.09 (t, 1H, C5), 7.33 (t, 1H, C6), 7.57 (d, 1H, C7), 7.75 (d, 1H, C4), 8.04 (s, 1H, C3) ppm;  $^{13}\text{C}$  NMR (d6-DMSO): 14.3, 14.4, 17.8, 18.2, 21.1, 21.2, 21.8, 22.5, 28.7, 29.3, 29.3, 29.7, 30.3, 30.4, 30.5, 30.6, 31.0, 31.9, 110.7, 120.5, 120.8, 123.3, 126.2, 133.6, 140.5 ppm; IR: 2926, 2856, 2361, 2341, 1734, 1717, 1699, 1684, 1653, 1636, 1623, 1576, 1559, 1540, 1521, 1507, 1458, 1419, 1326, 1204, 1144, 942, 895, 854, 835, 742, 718, 692, 679, 668, 652, 633  $\text{cm}^{-1}$ .

**[Bzmim][ $\text{Tf}_2\text{N}$ ]:**  $^1\text{H}$  NMR (d6-DMSO): 3.88 (s, 3H,  $\text{CH}_3$ ), 5.44 (s, 2H,  $\text{CH}_2$ ), 7.40-7.44 (m, 5H, C7~C9), 7.70 (s, 1H, C4), 7.78 (s, 1H, C5), 9.22 (s, 1H, C2) ppm;  $^{13}\text{C}$  NMR (d6-DMSO): 36.3 ( $\text{CH}_3$ ), 52.5 ( $\text{CH}_2$ ), 118.8 (q,  $J_{\text{C-F}} = 322.6$  Hz,  $\text{CF}_3$ ), 122.9 (d,  $J=17.2$  Hz, C4), 124.5 (d,  $J=18.0$  Hz, C5), 128.8 (s, C7 and C9), 129.2 (s, C11), 129.5 (s, C6 and C10), 135.3 (s, C8), 137.2 (d,  $J=9.5$  Hz, C2) ppm; IR: 3155, 3115, 1575, 1564, 1499, 1457, 1430, 1350, 1331, 1185, 1135, 1054, 845, 821, 790, 762, 740, 720, 699  $\text{cm}^{-1}$ .

**After the absorption of  $\text{SO}_2$ :**  $^1\text{H}$  NMR (d6-DMSO): 3.87 (s, 3H,  $\text{CH}_3$ ), 5.43 (s, 2H,  $\text{CH}_2$ ), 7.39-7.44 (m, 5H, C7~C9), 7.68 (s, 1H, C4), 7.76 (s, 1H, C5), 9.20 (s, 1H, C2)

ppm;  $^{13}\text{C}$  NMR (d6-DMSO): 36.4 (CH<sub>3</sub>), 52.6 (CH<sub>2</sub>), 118.9 (q,  $J_{\text{C-F}} = 322.6$  Hz, CF<sub>3</sub>), 123.0 (d,  $J=18.3$  Hz, C4), 124.6 (d,  $J=18.1$  Hz, C5), 128.9 (s, C7 and C9), 129.4 (s, C11), 129.6 (s, C6 and C10), 135.3 (s, C8), 137.3 (d,  $J=9.3$  Hz, C2) ppm; IR: 3157, 3119, 2363, 1575, 1563, 1499, 1457, 1430, 1334, 1226, 1188, 1136, 1055, 821, 790, 762, 740, 720, 699  $\text{cm}^{-1}$ .

**[EMim][Tf<sub>2</sub>N]:**  $^1\text{H}$  NMR (d6-DMSO): 1.44 (t, 3H, CH<sub>2</sub>CH<sub>3</sub>), 3.86 (s, 3H, CH<sub>3</sub>), 4.20 (q, 2H, CH<sub>2</sub>), 7.67 (s, 1H, Im C5), 7.75 (s, 1H, Im C4), 9.11 (s, 1H, Im C2) ppm;  $^{13}\text{C}$  NMR (d6-DMSO): 15.4, 36.1, 44.7, 118.8, 121.3, 122.4, 122.5, 124.0, 124.1, 136.8 ppm; IR: 3160, 3123, 2992, 1574, 1456, 1432, 1349, 1332, 1183, 1136, 1089, 1054, 959, 841, 790, 762, 740, 699  $\text{cm}^{-1}$ .

**After the absorption of SO<sub>2</sub>:**  $^1\text{H}$  NMR (d6-DMSO): 1.44 (t, 3H, CH<sub>2</sub>CH<sub>3</sub>), 3.86 (s, 3H, CH<sub>3</sub>), 4.20 (q, 2H, CH<sub>2</sub>), 7.66 (s, 1H, Im C5), 7.74 (s, 1H, Im C4), 9.09 (s, 1H, Im C2) ppm;  $^{13}\text{C}$  NMR (d6-DMSO): 15.5, 36.2, 44.8, 118.9, 121.4, 122.4, 122.6, 124.1, 124.2, 136.8 ppm; IR: 3160, 3123, 2988, 2359, 2342, 1573, 1457, 1431, 1334, 1227, 1187, 1136, 1055, 959, 839, 790, 763, 741, 696  $\text{cm}^{-1}$ .

**Table S1** The viscosities, densities and melting points of these ionic liquids for SO<sub>2</sub> capture.

| Ionic liquids                  | Viscosity <sup>a</sup> / cP | Density <sup>b</sup> / g cm <sup>-3</sup> | Melting point/ <sup>o</sup> C |
|--------------------------------|-----------------------------|-------------------------------------------|-------------------------------|
| [P <sub>66614</sub> ][BenIm]   | 713                         | 0.922                                     | -61                           |
| [P <sub>66614</sub> ][2-Ph-Im] | 1041                        | 0.956                                     | -58                           |
| [P <sub>66614</sub> ][BenTriz] | 464                         | 0.923                                     | -62                           |
| [P <sub>66614</sub> ][Indz]    | 376                         | 0.906                                     | -61                           |
| [P <sub>66614</sub> ][Im]      | 424                         | 0.915                                     | -60                           |

<sup>a</sup> Measured at 25 °C; <sup>b</sup> Measured at 30 °C.

**Table S2.** The effect of low partial pressure of SO<sub>2</sub>, temperature, and water on SO<sub>2</sub> capture by [P<sub>66614</sub>][BenIm] and [P<sub>66614</sub>][2-Ph-Im].<sup>a</sup>

| Ionic liquids                  | SO <sub>2</sub> absorption <sup>b</sup> |                    |                          |                         |                                         |
|--------------------------------|-----------------------------------------|--------------------|--------------------------|-------------------------|-----------------------------------------|
|                                | 10% SO <sub>2</sub>                     | 1% SO <sub>2</sub> | 2000 ppm SO <sub>2</sub> | 500 ppm SO <sub>2</sub> | 100% SO <sub>2</sub> (wet) <sup>c</sup> |
| [P <sub>66614</sub> ][BenIm]   | 2.46(1.86)                              | 1.76(1.56)         | 1.62(1.47)               | 1.52(1.41)              | 5.78                                    |
| [P <sub>66614</sub> ][2-Ph-Im] | 2.59(1.92)                              | 1.76(1.52)         | 1.58(1.37)               | 1.39(1.30)              | 5.76                                    |

<sup>a</sup> The absorption was carried out at 20 °C. <sup>b</sup> Mole SO<sub>2</sub> per mole IL. <sup>c</sup> Relative humidity is 100%. <sup>d</sup> Value given in brackets was measured at 40 °C.

**Table S3.** The comparison of SO<sub>2</sub> absorption by phenyl-containing azole-based ILs with that by other typical ILs.

| Ionic liquids <sup>a</sup>               | Temperature/<br>°C | SO <sub>2</sub> absorption <sup>b</sup> |                | Reference              |
|------------------------------------------|--------------------|-----------------------------------------|----------------|------------------------|
|                                          |                    | at 1 bar                                | at 0.1 bar     |                        |
| [P <sub>66614</sub> ][BenIm]             | 20                 | 5.75 (0.61)                             | 2.46 (0.26)    | This work              |
| [P <sub>66614</sub> ][2-Ph-Im]           | 20                 | 5.74 (0.59)                             | 2.59 (0.26)    | This work              |
| [P <sub>66614</sub> ][Im]                | 20                 | 4.80 (0.56)                             | 2.07 (0.24)    | Wang <sup>2</sup>      |
| [P <sub>444E3</sub> ][Tetz]              | 20                 | 5.00 (0.76)                             | 1.87 (0.29)    | Wang <sup>2</sup>      |
| [P <sub>66614</sub> ][SCN]               | 20                 | 3.24 (0.38)                             | 1.06 (0.13)    | Wang <sup>3</sup>      |
| [TMG][L]                                 | 40                 | 1.70 (0.53) <sup>c</sup>                | 0.978 (0.31)   | Han <sup>4</sup>       |
| [TMG][PhO]                               | 20                 | 2.58 (0.79)                             | -              | Zhang <sup>5</sup>     |
| [TMG][TE]                                | 20                 | 4.13 (1.23)                             | -              | Zhang <sup>5</sup>     |
| [TMG][BF <sub>4</sub> ]                  | 20                 | 1.27 (0.40)                             | 0.064 (0.02)   | Riisager <sup>6</sup>  |
| [TMGBu <sub>2</sub> ][Tf <sub>2</sub> N] | 20                 | 1.60 (0.20)                             | 0.080 (0.01)   | Riisager <sup>6</sup>  |
| [TMG][Tf <sub>2</sub> N]                 | 20                 | 1.18 (0.19)                             | 0.061 (0.01)   | Riisager <sup>6</sup>  |
| [Bmim][BF <sub>4</sub> ]                 | 20                 | 1.50 (0.40)                             | 0.005 (0.001)  | Riisager <sup>6</sup>  |
| [Bmim][MeSO <sub>4</sub> ]               | 50                 | 0.980 (0.25)                            | -              | Jung <sup>7</sup>      |
| [Bmim][OAc]                              | 25                 | 1.91 (0.62)                             | 0.664 (0.21)   | Shiflett <sup>8</sup>  |
| [Bzmim][Tf <sub>2</sub> N]               | 20                 | 1.51 (0.21)                             | -              | This work              |
| [Hmim][Tf <sub>2</sub> N]                | 25                 | 0.916 (0.13)                            | 0.005 (0.0007) | Brennecke <sup>9</sup> |
| [E <sub>1</sub> mim][MeSO <sub>3</sub> ] | 30                 | 2.30 (0.62)                             | -              | Kim <sup>10</sup>      |

<sup>a</sup> [P<sub>66614</sub>][BenIm], trihexyl(tetradecyl)phosphonium benzimidazole; [P<sub>66614</sub>][2-Ph-Im], trihexyl(tetradecyl)phosphonium 2-phenylimidazole; [P<sub>66614</sub>][Im], trihexyl(tetradecyl)phosphonium imidazole; [P<sub>66614</sub>][Tetz], trihexyl(tetradecyl)phosphonium tetrazolate; [Emim][SCN], 1-ethyl-3-methylimidazolium thiocyanate; [TMG][L], 1,1,3,3-tetramethylguanidinium lactate; [TMG][PhO], 1,1,3,3-tetramethylguanidinium phenolate; [TMG][TE], 1,1,3,3-tetramethylguanidinium trifluoroethoxyate; [TMG][BF<sub>4</sub>], 1,1,3,3-tetramethylguanidinium tetrafluoroborate; [TMGBu<sub>2</sub>][Tf<sub>2</sub>N], 1,1,3,3-tetramethyldibutylguanidinium bis(trifluoromethylsulfonyl)imide; [TMG][Tf<sub>2</sub>N], 1,1,3,3-tetramethylguanidinium bis(trifluoromethylsulfonyl)imide; [Bmim][BF<sub>4</sub>], 1-butyl-3-methylimidazolium tetrafluoroborate; [Bmim][MeSO<sub>4</sub>], 1-butyl-3-methylimidazolium methylsulfate; [Bmim][OAc], 1-butyl-3-methylimidazolium acetate; [Bzmim][Tf<sub>2</sub>N], 1-benzyl 3-methylimidazolium bis(trifluoromethylsulfonyl)imide; [Bmim][Tf<sub>2</sub>N], 1-butyl-3-methylimidazolium bis(trifluoromethylsulfonyl)imide; [Hmim][Tf<sub>2</sub>N], 1-hexyl-3-methylimidazolium bis(trifluoromethylsulfonyl)imide; [E<sub>1</sub>mim][MeSO<sub>3</sub>], 1-ethylene glycol monomethyl ether-3-methylimidazolium methanesulfonate. <sup>b</sup> mole SO<sub>2</sub>/mole IL (g SO<sub>2</sub>/g IL). <sup>c</sup>At 1.2 bar.

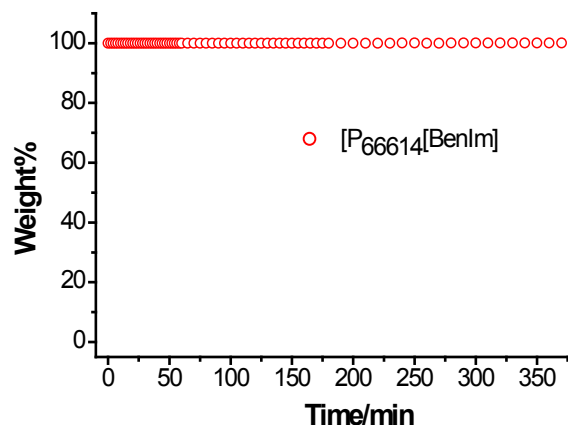

**Fig. S1** The stability of [P<sub>66614</sub>][BenIm] as a function of time at 80 °C under N<sub>2</sub> containing 100 % humidity.

### References:

- (1) Zhao, D.; Fei, Z.; Scopelliti, R.; Dyson, P. J. *Inorg. Chem.* **2004**, *43*, 2197.
- (2) Wang, C. M.; Cui, G. K.; Luo, X. Y.; Xu, Y. J.; Li, H. R.; Dai, S. J. *Am. Chem. Soc.* **2011**, *133*, 11916.
- (3) Wang, C.; Zheng, J.; Cui, G.; Luo, X.; Guo, Y.; Li, H. *Chem. Commun.* **2013**, *49*, 1166.
- (4) Wu, W. Z.; Han, B. X.; Gao, H. X.; Liu, Z. M.; Jiang, T.; Huang, J. *Angew. Chem., Int. Ed.* **2004**, *43*, 2415.
- (5) Shang, Y.; Li, H. P.; Zhang, S. J.; Xu, H.; Wang, Z. X.; Zhang, L.; Zhang, J. M. *Chem. Eng. J. (Lausanne)* **2011**, *175*, 324.
- (6) Huang, J.; Riisager, A.; Wasserscheid, P.; Fehrmann, R. *Chem. Commun.* **2006**, 4027.
- (7) Lee, K. Y.; Gong, G. T.; Song, K. H.; Kim, H.; Jung, K. D.; Kim, C. S. *Int. J. Hydrogen Energy* **2008**, *33*, 6031.
- (8) Shiflett, M. B.; Yokozeki, A. *Ind. Eng. Chem. Res.* **2010**, *49*, 1370.
- (9) Anderson, J. L.; Dixon, J. K.; Maginn, E. J.; Brennecke, J. F. *J. Phys. Chem. B* **2006**, *110*, 15059.
- (10) Hong, S. Y.; Im, J.; Palgunadi, J.; Lee, S. D.; Lee, J. S.; Kim, H. S.; Cheong, M.; Jung, K. D. *Energy Environ. Sci.* **2011**, *4*, 1802.
